# Supplementary material for: Application of scanning electrochemical microscopy for topography imaging of supported lipid bilayers
Source: Royal Society of Chemistry journal article supplement (doi:10.1039/d2ay00154c), 2022-01-01
Supplement: d2ay00154c1.pdf [file d2ay00154c1.pdf]

## Supplementary data

### Application of scanning electrochemical microscopy for topography imaging of supported lipid bilayers

Zahra Nasri,<sup>\*a</sup> Seyedali Memari,<sup>ab</sup> Johanna Striesow,<sup>a</sup> Klaus-Dieter Weltmann,<sup>a</sup> Thomas von Woedtke<sup>ac</sup> and Kristian Wende<sup>\*a</sup>

A

| Lipid peroxidation product | m/z positive mode | m/z negative mode |
|----------------------------|-------------------|-------------------|
| DOPE (18:1_9:0CHO)         | 634.39            | 632.39            |
| DOPE + 1O/keto/epoxy       | 760.54            | 758.53            |
| DOPE + 3O                  | 792.53            | 790.53            |

B

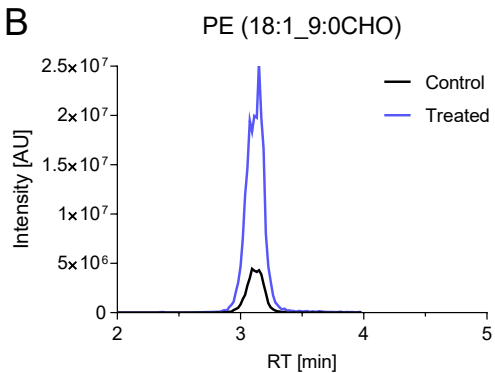

C

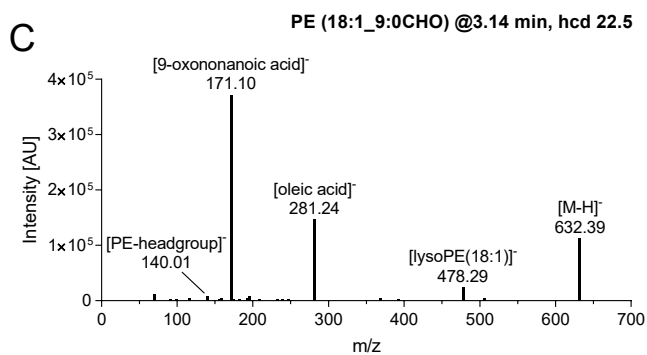

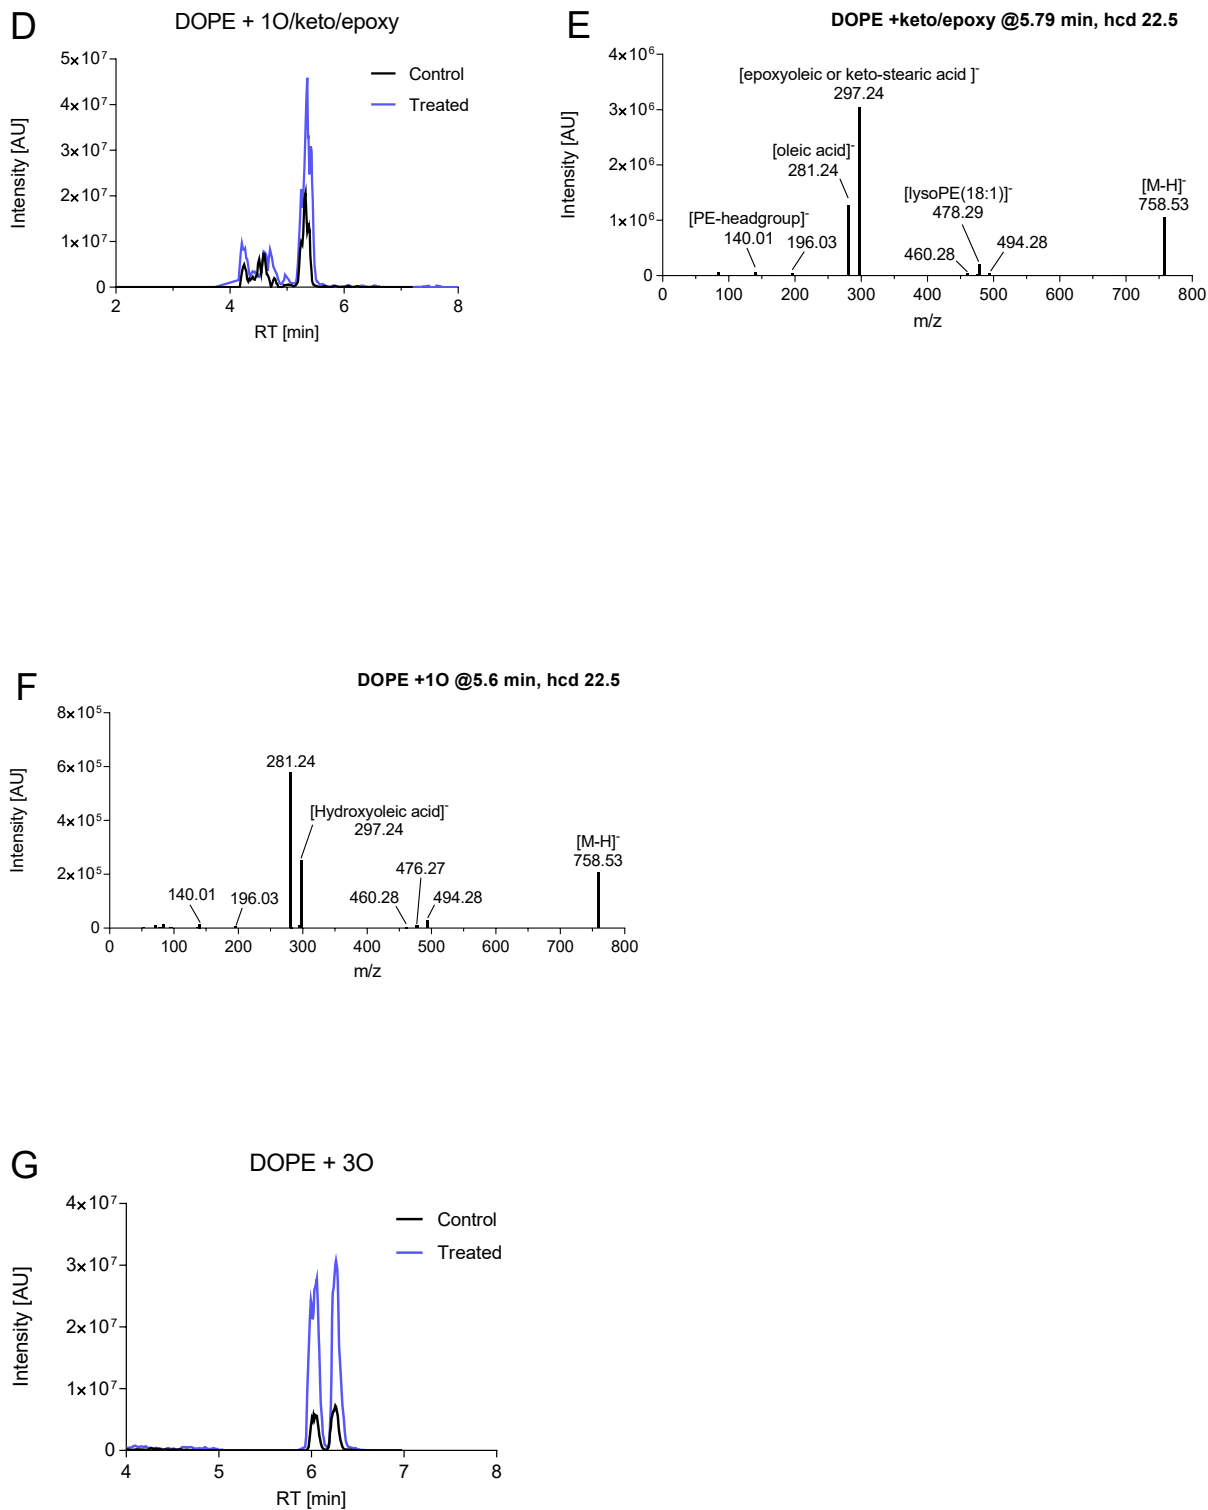

Figure S1: Validation of lipid peroxidation products (A) with corresponding extracted ion chromatograms (B,D,G) and MSMS fragmentation spectrum (E,F). For DOPE + 1O/keto/epoxy precursor mass was identical, but MSMS fragmentation showed a distinct differentiation between a modification with a keto or epoxy group and a hydroxylation (E,F). A modification with a keto or epoxy group could not be distinguished from each other.
